# Supplementary material
Source: PubMed Central journal article supplement (PMC6158414)
Supplement: zjv020183936s5.pdf [file zjv020183936s5.pdf]

### Supplemental Movie 1

Example movie of TZM-bl cells transfected with nontargeting siRNA and subsequently inoculated with VSV-G-pseudotyped HIV vector particles that were dual-labeled with GFP-Vpr and S15-mCherry. Images in the GFP channel were captured every 0.5 s for a period of 2.5 min. The video represents a rate of four frames/second.

### Supplemental Movie 2

Example movie of TZM-bl cells transfected with DYNC1H1 siRNA and inoculated with HIV vector particles, imaged as described in Supplemental Movie 1.

### Supplemental Movie 3

Example video of TZM-bl cells transfected with BICD2 siRNA and inoculated with HIV vector particles, imaged as described in Supplemental Movie 1.
